# Supplementary material for: Activation of autophagy inhibits the activation of NLRP3 inflammasome and alleviates sevoflurane-induced cognitive dysfunction in elderly rats
Source: PubMed Central journal article supplement (PMC9883890; doi:10.1186/s12868-023-00777-5), 2023-01-28

Western blots original band

# IL-6

23KD

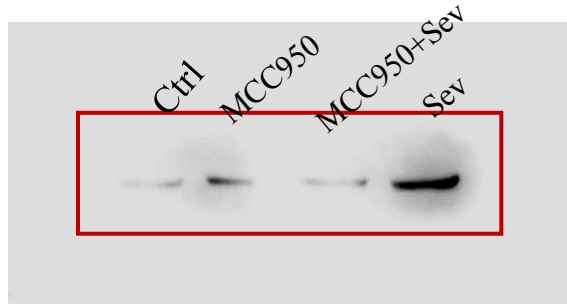

23KD

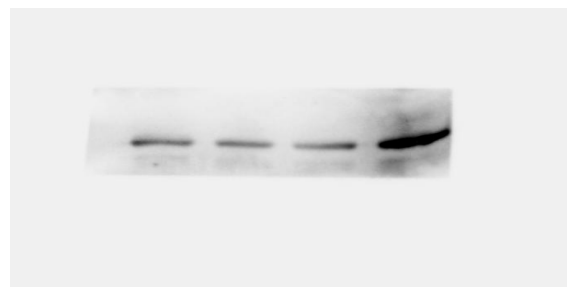

23KD

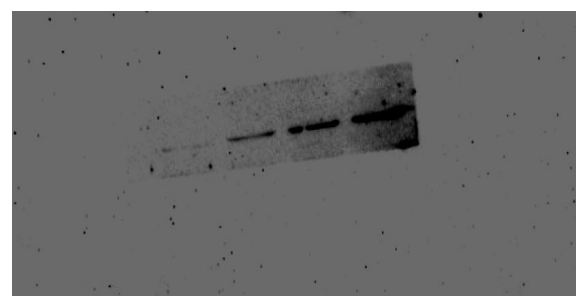

23KD

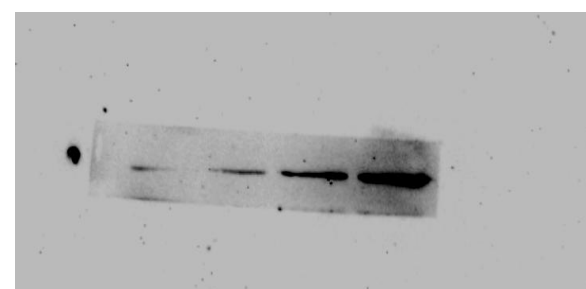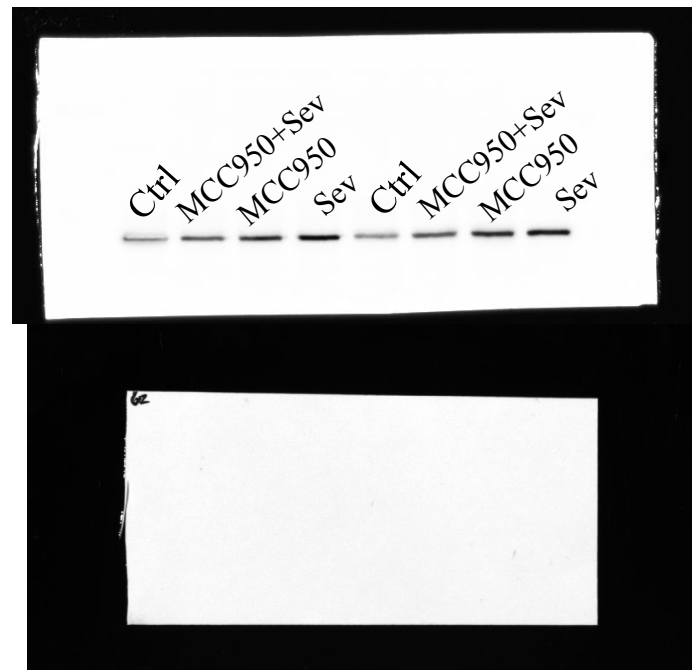

$\beta$ -actin

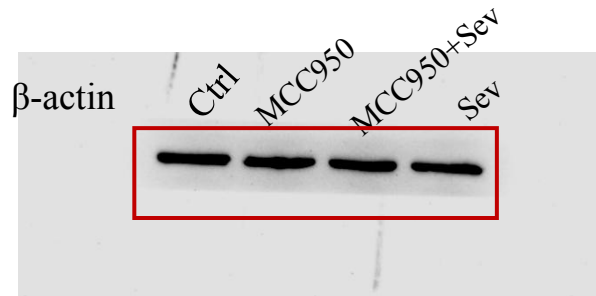

TNF- $\alpha$

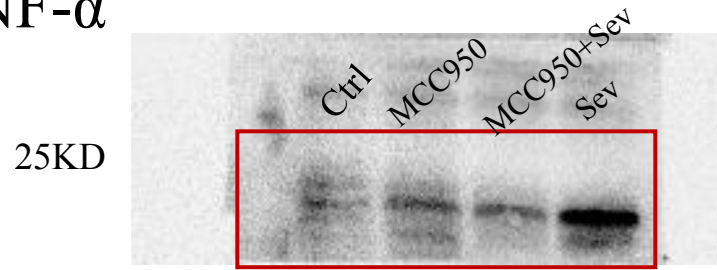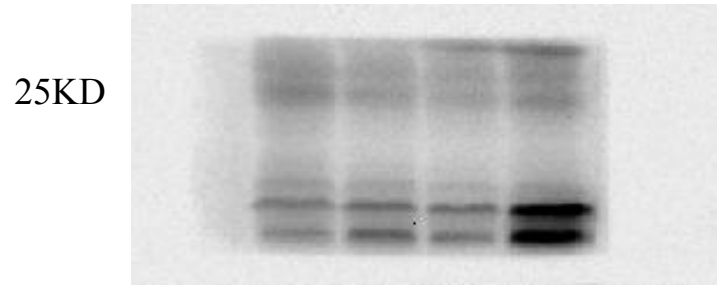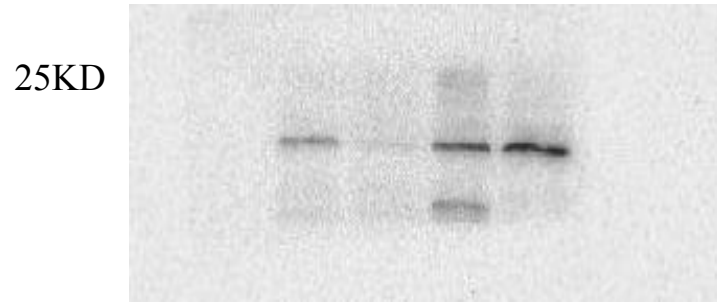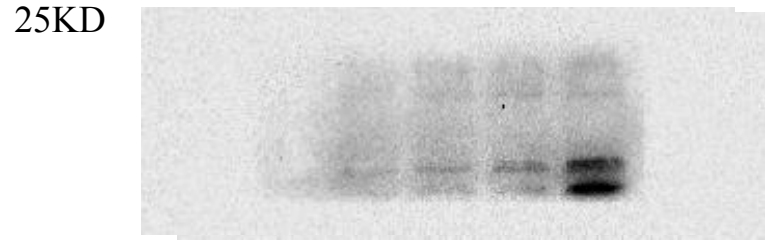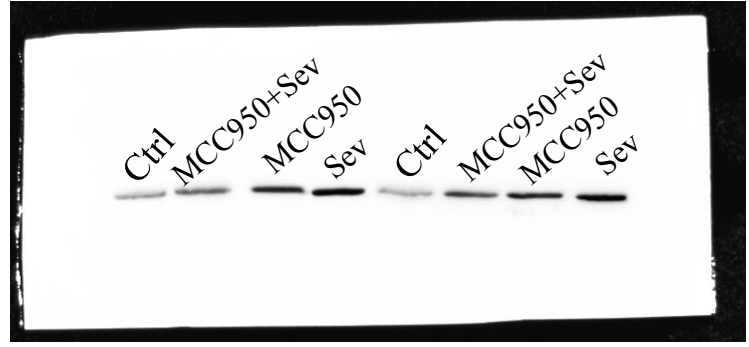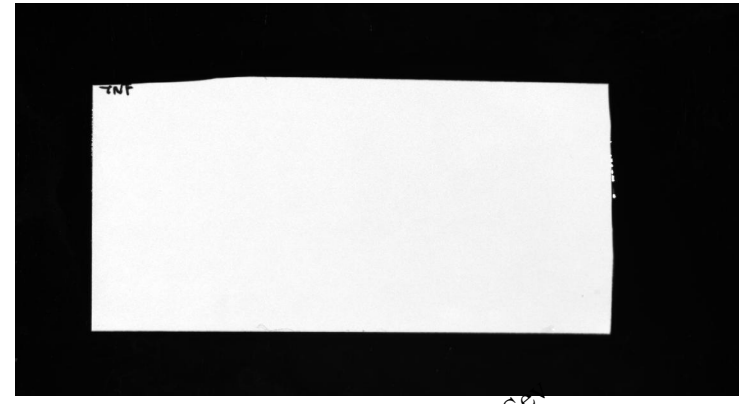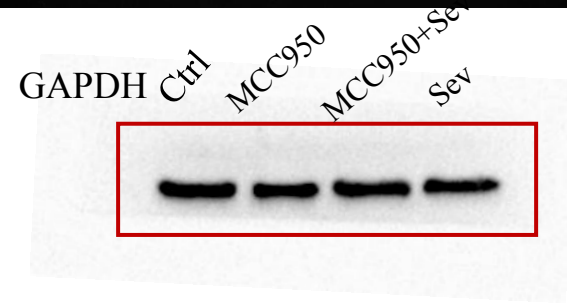

# NLRP3

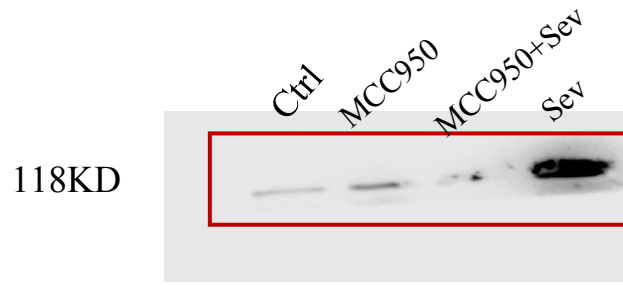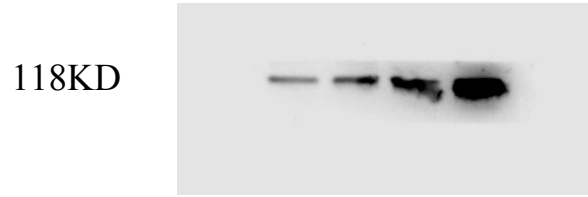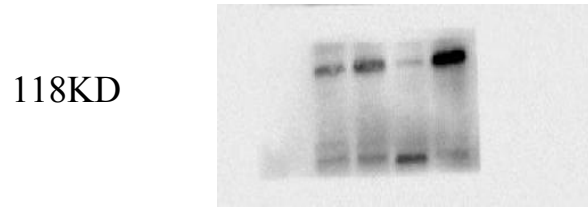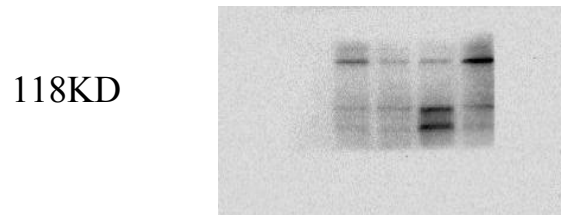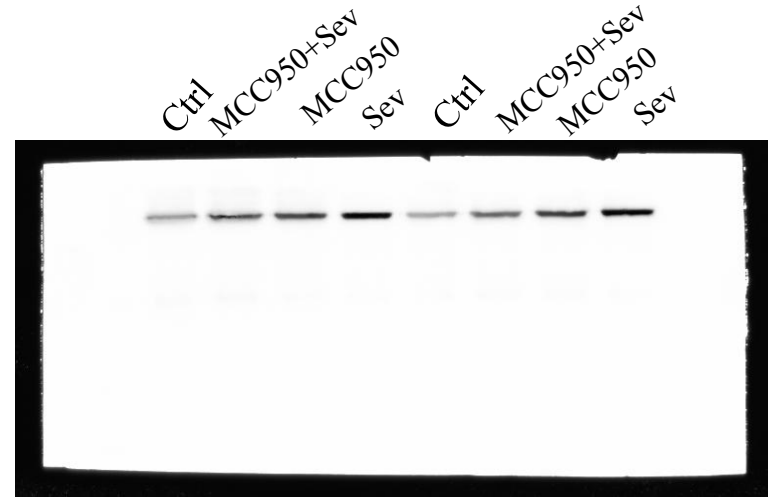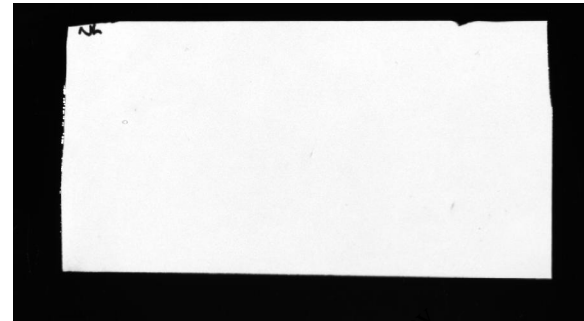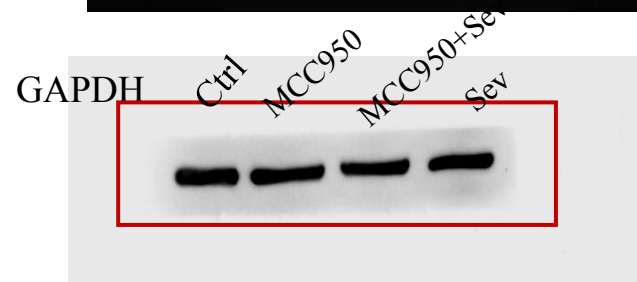

# Caspase-1

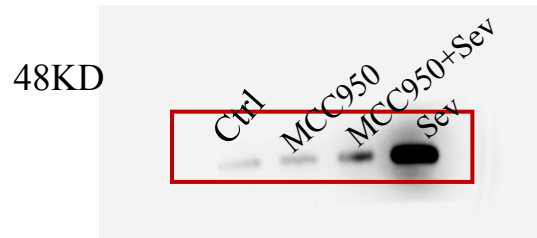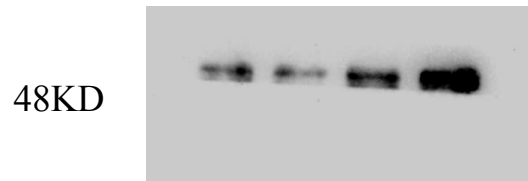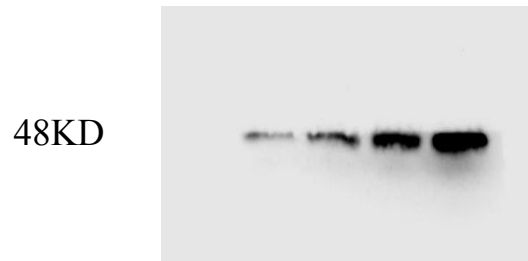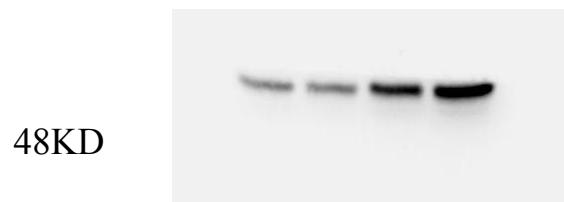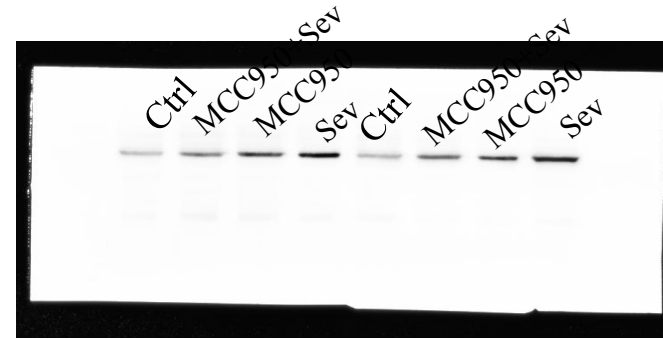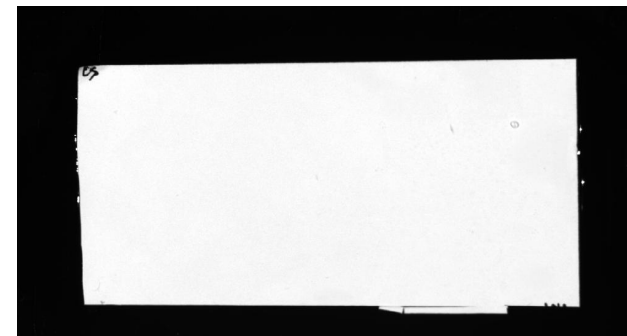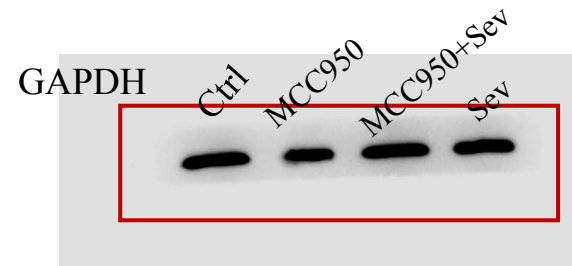

# IL-1 $\beta$

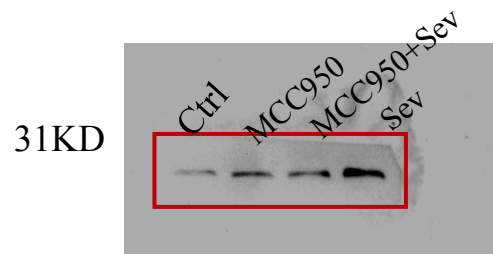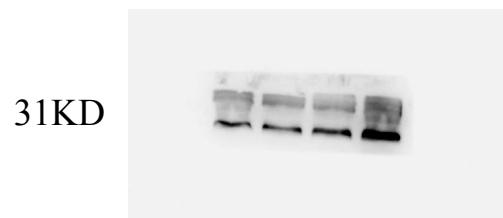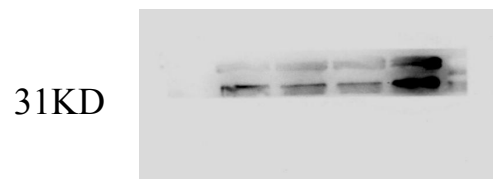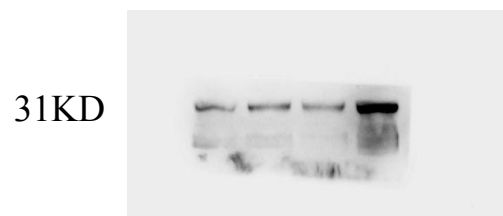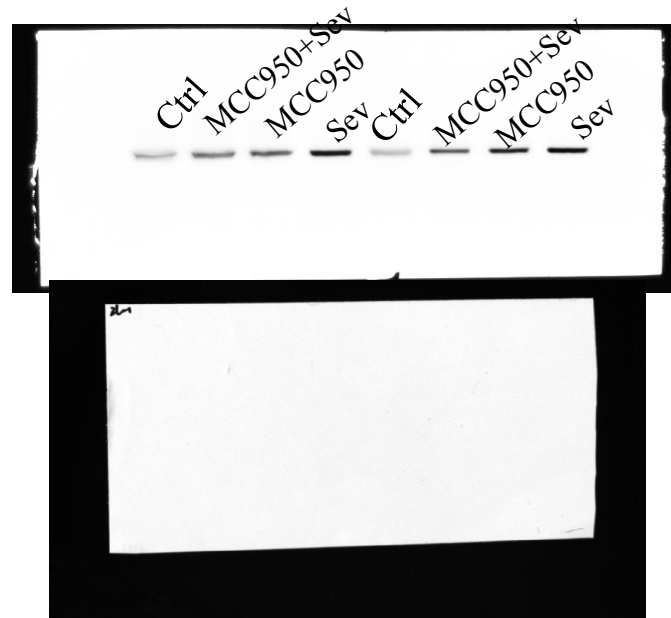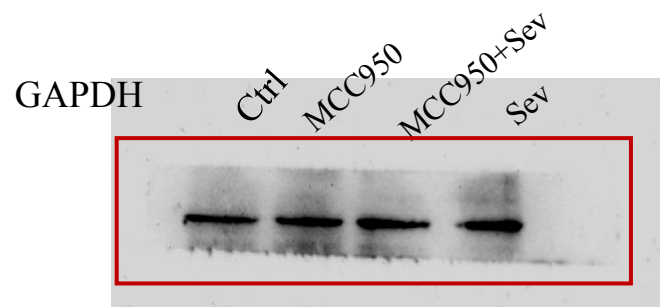

# IL-18

24KD

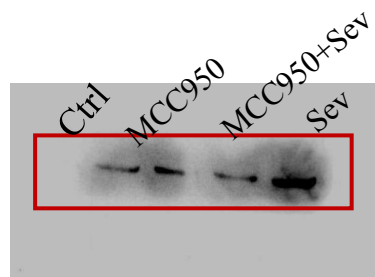

24KD

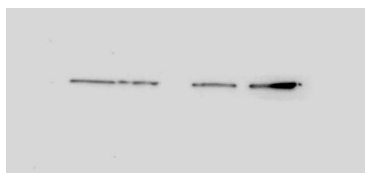

24KD

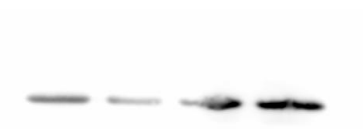

24KD

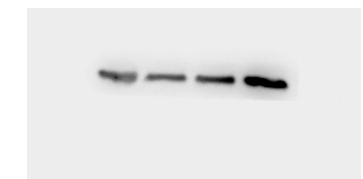

GAPDH

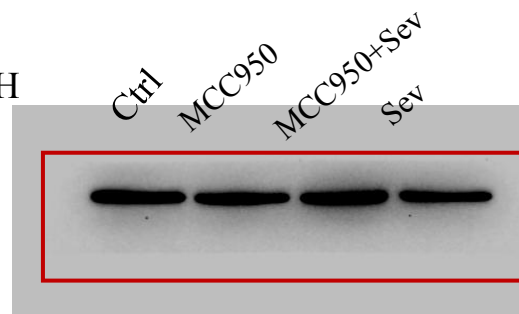

# LC3B

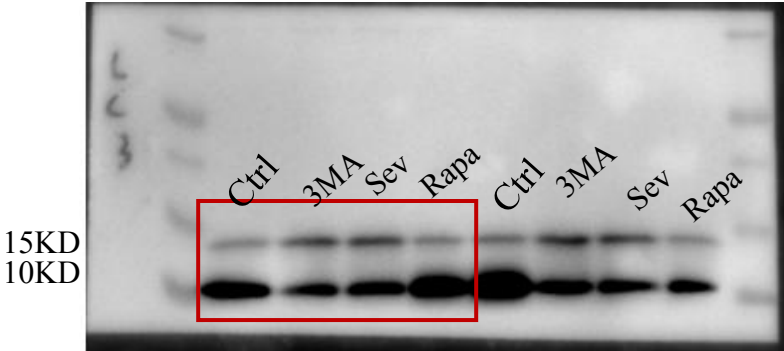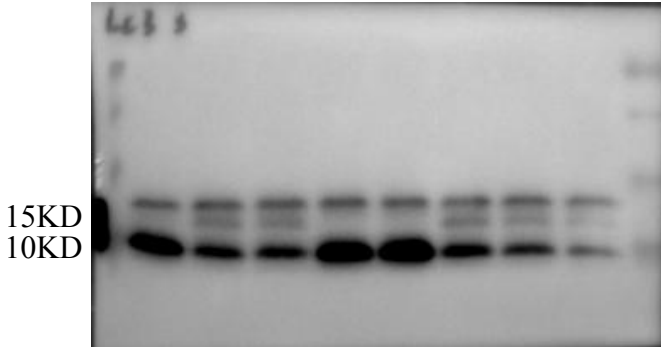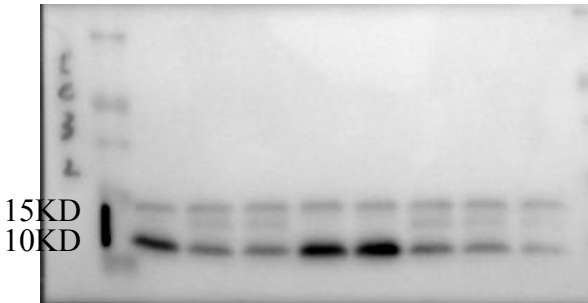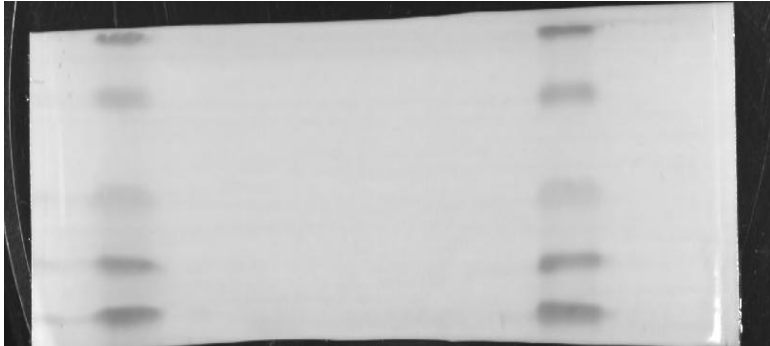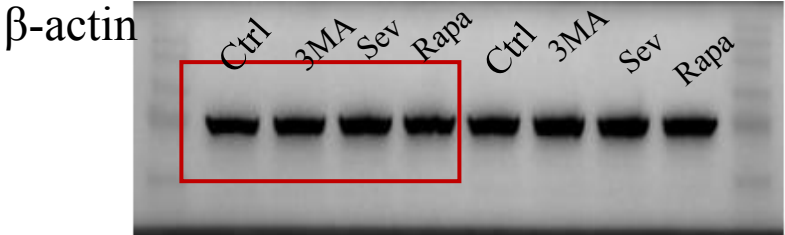



P62

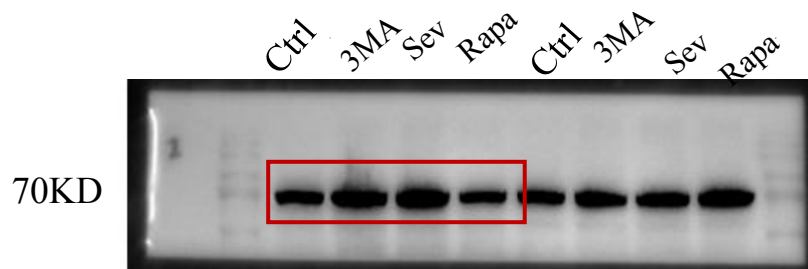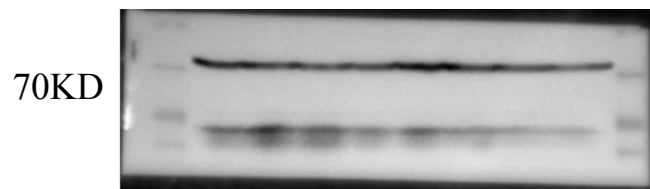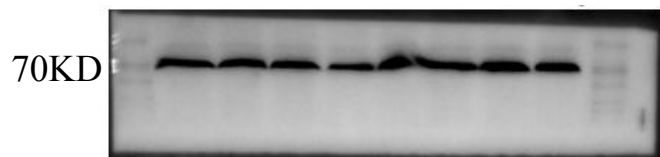

$\beta$ -actin

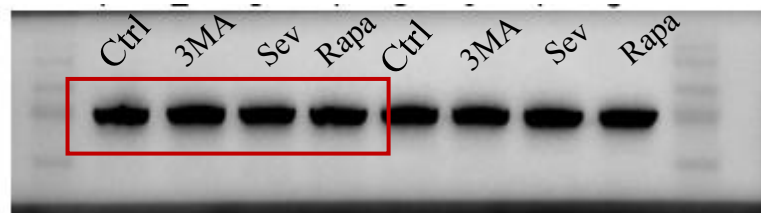

Supplement: 12868_2023_777_MOESM1_ESM.pdf [file 12868_2023_777_MOESM1_ESM.pdf]
